# Supplementary material for: Extensive Recombination of a Yeast Diploid Hybrid through Meiotic Reversion
Source: PLoS Genet. 2016 Feb 1;12(2):e1005781. doi: 10.1371/journal.pgen.1005781 (PMC4734685; doi:10.1371/journal.pgen.1005781)
Supplement: S5 Table — "Recombination events corrected after estimation of masked CO", "Corrected CO" column: For RTG7-10, the number represents the CO observed by LOH analysis + CO masked detected by sporulation and tetrad genotyping. For RTG11-21, the numbers represent the CO observed by LOH analysis corrected with both ½ or ⅔ factors). Corrected NCO: the numbers are calculated as (nrLOH – 0.81 x corrected CO). (XLSX) [file pgen.1005781.s017.xlsx]

## Sheet: Feuil1
RTG pair	Reciprocal LOH (rLOH)			Non-reciprocal LOH (nrLOH)				Recombination events deduced from LOH		Recombination events corrected after estimation of masked CO
	total rLOH	interstitial rLOH	terminal rLOH	total nrLOH	interstitial nrLOH adjacent to rLOH	isolated interstitial rLOH	terminal nrLOH	Observed CO	Observed NCO	Corrected CO	Corrected NCO
7-M/-D	34	20	14	139	46	82	11	54	93	81	73
8-M/-D	6	2	4	55	7	42	6	8	48	10	45
9-M/-D	3	0	3	30	2	24	4	3	28	4	26
10-M/-D	9	3	6	95	10	78	7	12	85	19	80
11-M/-D	22	18	4	88	36	50	2	40	52	80-60	23-39
12-M/-D	2	0	2	29	2	26	1	2	27	4-3	26-27
13-M/-D	1	0	1	5	1	4	0	1	4	2-2	3-4
14-M/-D	3	1	2	50	3	44	3	4	47	8-6	44-45
15-M/-D	1	0	1	36	1	34	1	1	35	2-2	34-35
16-M/-D	8	0	8	73	7	59	7	8	66	16-12	60-63
17-M/-D	22	14	8	89	22	60	7	36	67	72-54	31-45
18-M/-D	6	0	6	59	4	51	4	6	55	12-9	49-52
19-M/-D	5	2	3	36	4	28	4	7	32	14-11	25-27
20-M/-D	1	1	0	32	1	31	0	2	31	4-3	29-30
21-M/-D	13	5	8	97	18	70	9	18	79	36-27	68-75
Total	136	66	70	913	164	683	66	202	749	404-303	586-668
